# Supplementary material for: Self-Selection of Bathroom-Assistive Technology: Development of an Electronic Decision Support System (Hygiene 2.0)
Source: PubMed Central journal article supplement (PMC7445614; doi:10.2196/16175), 2020-08-10
Supplement: jmir_v22i8e16175_app2.pdf [file jmir_v22i8e16175_app2.pdf]

## Appendix 2: Interview guide for focus groups

### Interview guide for older adults and caregiver focus groups

A. Experience in regard of a safe bathroom design and the choice of assistive technology.

- Could you tell us about your **experiences** when the time came to **make safety changes** in your/your relative's bathroom.

*- Description of the situation*

- **How** did you find the information?
- **Where** did you go?
- **Who** did you go to?
- If you/your relative own(s) an assistive technology for your personal hygiene, could you describe **the steps you went through from the choice to the use** of the assistive technology?

*- Choices, answers to your questions, choices, purchase, use*

- What was the **easiest**?
- What was the **hardest**? - *challenges, complicated steps*
- Following the experience you had, which information do you believe **should be made available** and could **be useful** in regard to the safe design of a bathroom and the selection of an assistive technology?
  - In which **form**? - *pamphlet, computer, auxiliaries*

B. ALGO: Relevance, use, and advantages of an electronic version.

*Present an example of the electronic version of the Algo*

*Explain how an electronic version of the Algo could be usable by people with autonomy losses and their relatives.*

- Would you see some **benefits** in the use of a similar tool on a computer support?
  - What could be **relevant/useful** for you?
  - What could make the use a computer support **interesting**?

C. Needs in regards to health information

- Do you use the **Internet** to obtain **health information**? (Banas, 2009)
  - If yes, **which** kind of information are you looking for?
  - If no, **where** do you find your information (pharmacy, clinic, relatives or caregivers, friends)?
  - With or without the use of internet, how do you **save** the information you find useful?
  - [If yes,]
    - In your opinion, what are the positive aspects of the internet when you are looking for health information? (Banas, 2009) - *Describe your positive experiences*
    - In your opinion, what are the negative aspects of the internet when you are looking for health information? (Banas, 2009) - *Describe your negative experiences*
- [Among the web sites lists you obtain during the research, what pushes you to: ]
  - **Click** on the web site link
  - Choose to **explore** or not the web site more extensively
- If there was an **electronic tablet in the pharmacy** containing health information, would you be willing to use it?

D. Use of computer technology

- Let's talk about the software support you are using (computer, tablet, Smartphone) and the reasons why you use them (email, text writing, budget, internet)?
  - *Associate the type of software support to the activity*
- Now, let's talk about your personal **preferences**. Which type of software support do you prefer to use and for which reasons?

- socio-demographic questionnaire
- Acknowledgments

E. Conclusion

- As the focus group reaches its end, we still have X minutes if you want to clarify some aspects or bring out suggestions.

- confidentiality reminder

- Acknowledgments

- Submit the consent form and the socio-demographic questionnaire
